# Supplementary material
Source: Springer Nature journal article supplement (https://www.springermedizin.de/resource/supplementary/12889_2009_2034_MOESM3_ESM.pdf/9484386)
Supplement: MOESM3 [file 9484386]

## CHOCOLATE

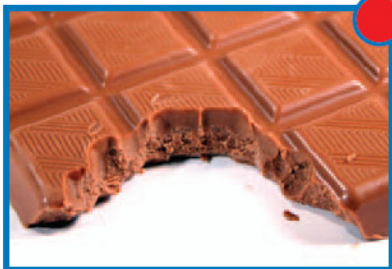

**FAT (g)** 30.7

**SUGAR (g)** 56.9

**SALT (mg)** 90

**PROTEIN (g)** 7.7

**FIBRE (g)** 0.8

**CALORIES (kcal)** 520

The average British family spends more on chocolate in a year than a cocoa farmer earns in a year.

## APPLE

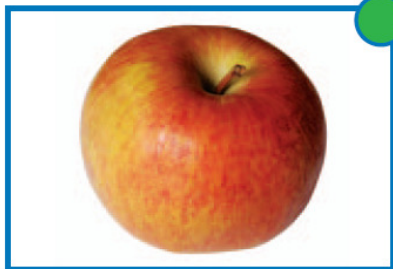

**FAT (g)** 0.1

**SUGAR (g)** 11.8

**SALT (mg)** 3

**PROTEIN (g)** 0.4

**FIBRE (g)** 1.8

**CALORIES (kcal)** 47

One variety of apple can be kept for up to two years and still be eaten.
